# Supplementary material for: Electroless deposition of RuO2-based nanoparticles for energy conversion applications
Source: Royal Society of Chemistry journal article supplement (doi:10.1039/c8ra07810f), 2019-01-01
Supplement: c8ra07810f1.pdf [file c8ra07810f1.pdf]

## Electroless Deposition of RuO<sub>2</sub>-based Nanoparticles for Energy Conversion Applications

Jing-Mei Li<sup>\*a,b</sup>, Chi-Chang Hu<sup>\*a</sup>, Tzu-Ho Wu<sup>a</sup>, and Yung-Jung Hsu<sup>b</sup>

<sup>a</sup>Department of Chemical Engineering, National Tsing Hua University, Hsinchu 30013, Taiwan.

<sup>b</sup>Department of Materials Science and Engineering, National Chiao Tung University, Hsinchu 30010, Taiwan.

\*E-mail: [cchu@che.nthu.edu.tw](mailto:cchu@che.nthu.edu.tw); [maylinli\\_may@hotmail.com](mailto:maylinli_may@hotmail.com)

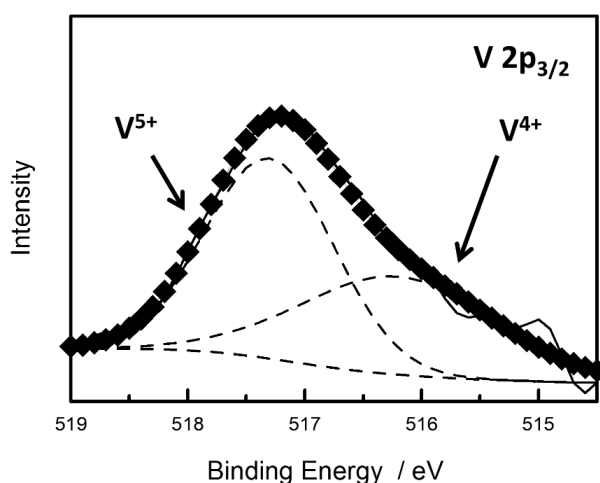

**Figure S1.** XPS spectra of VO<sub>x</sub> electrodeposited at 0.4 V.

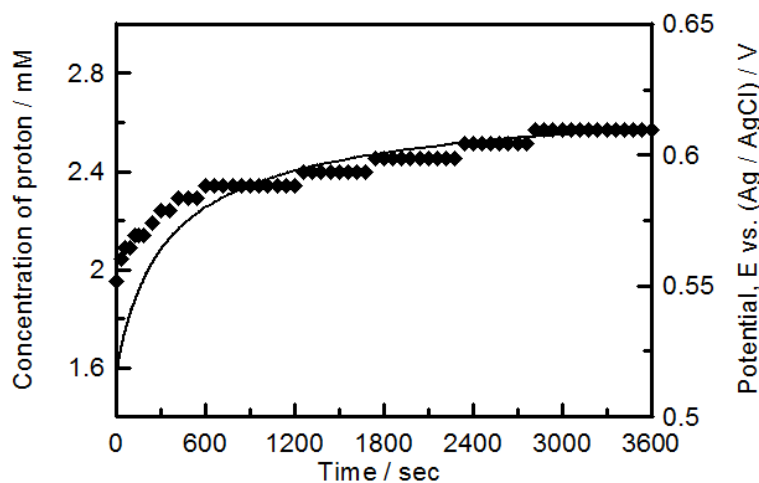

**Figure S2** Concentration of proton at the surface of VO<sub>x</sub>·mH<sub>2</sub>O without potential bias and open-circuit potential record with time.

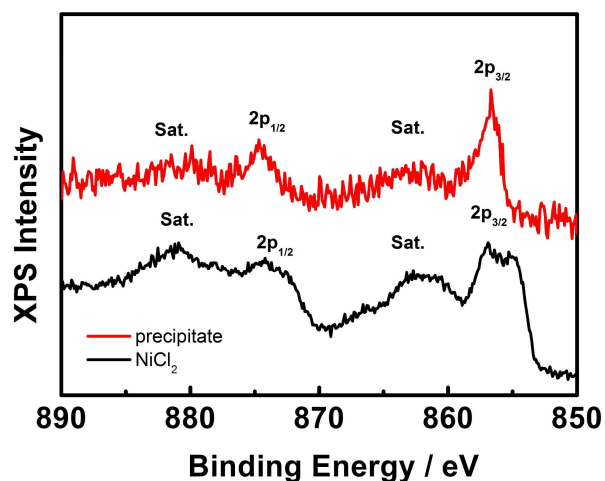

**Figure S3.** Ni XPS spectra of precursor  $\text{NiCl}_2$  and the precipitate from the solution containing  $\text{VOSO}_4$  and  $\text{NiCl}_2$ . In comparison with the precursor  $\text{NiCl}_2$ , the precipitate displayed different Ni 2p spectrum. This result demonstrates the oxidation of  $\text{NiCl}_2$  to form the nickel oxyhydroxide, generalized the application of this unique deposition method.

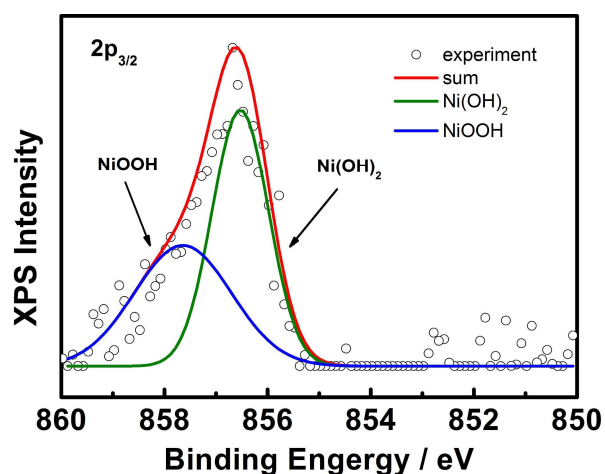

**Figure S4.** Ni  $2p_{3/2}$  XPS spectrum of the precipitate from the solution containing  $\text{VOSO}_4$  and  $\text{NiCl}_2$ . This result demonstrates the oxidation of  $\text{NiCl}_2$  to form the nickel oxyhydroxide, generalized the application of this unique deposition method.

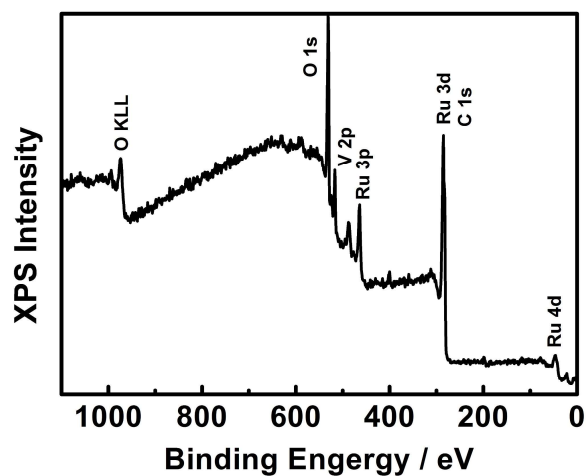

**Figure S5** XPS survey spectrum of RuO<sub>2</sub>-based nanoparticle suspensions

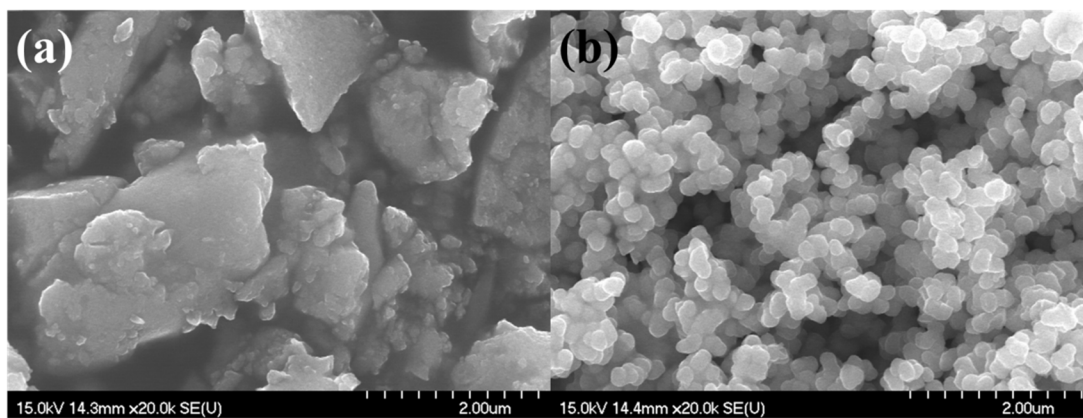

**Figure S6** SEM images of (a) RuO<sub>2</sub>·nH<sub>2</sub>O prepared by adjusting pH value of the 5 mM RuCl<sub>3</sub>·xH<sub>2</sub>O + 5 mM CH<sub>3</sub>COONa solution to 12 and (b) Ru<sub>w</sub>V<sub>y</sub>O<sub>x</sub>·pH<sub>2</sub>O.
